# Supplementary material
Source: publisher site journal article supplement (https://www.dovepress.com/article/386708)
Supplement: Supplementary file 1 [file get_supplementary_file.php]

**Supplementary Table 1. Search strategy**

| **Databases and other search methods** | **Search strategy** | **Results** |
| --- | --- | --- |
| EBSCOhost | TX ( "resistance training" OR "aerobic exercise" OR "fitness" OR "exercise" OR "physical exercise" OR "physiotherapy" OR "respiratory therapy" OR "pulmonary rehabilitation" ) AND TX ( “Covid” OR “sars” OR “coronavirus” OR "sars-cov-2" ) | 66 |
| Pubmed | (("Covid"[Title/Abstract] OR "sars"[Title/Abstract] OR "coronavirus"[Title/Abstract] OR "SARS-CoV-2"[Title/Abstract] OR "coronavirus"[MeSH Terms]) AND (("clinical study"[Publication Type] OR "clinical trial"[Publication Type] OR "comparative study"[Publication Type] OR "controlled clinical trial"[Publication Type]) AND ("english"[Language] OR "portuguese"[Language] OR "spanish"[Language]) AND "adult"[MeSH Terms]) AND (("physical activity"[Title/Abstract] OR "aerobic capacity"[Title/Abstract] OR "resistance training"[Title/Abstract] OR "aerobic exercise" [Title/Abstract] OR ("fitness"[All Fields] OR "fitnesses"[All Fields]) OR ("exercise"[MeSH Terms] OR "exercise"[All Fields] OR "exercises"[All Fields] OR "exercise therapy"[MeSH Terms] OR ("exercise"[All Fields] AND "therapy"[All Fields]) OR "exercise therapy"[All Fields] OR "exercise s"[All Fields] OR "exercised"[All Fields] OR "exerciser"[All Fields] OR "exercisers"[All Fields] OR "exercising"[All Fields]) OR "physical exercise"[Title/Abstract] OR "physiotherapy"[Title/Abstract]) OR "respiratory therapy" [Title/Abstract]) OR "pulmonary rehabilitation"[Title/Abstract]) AND (("clinical trial"[Publication Type] OR "controlled clinical trial"[Publication Type]) AND ("english"[Language] OR "portuguese"[Language] OR "spanish"[Language]) AND "adult"[MeSH Terms]))) AND ((clinicaltrial[Filter] OR controlledclinicaltrial[Filter]) AND (english[Filter] OR portuguese[Filter] OR spanish[Filter]) AND (alladult[Filter]))) | 29 |
| Science Direct | ("resistance training" OR "aerobic exercise" OR "fitness" OR "exercise" OR "physical exercise" OR "physiotherapy" OR "respiratory therapy" OR "pulmonary rehabilitation" AND “Covid” OR “sars” OR “coronavirus” OR “SARS-CoV-2” AND “clinical trials”) | 9 |
| SCOPUS | ("physical activity" OR "aerobic capacity" OR "resistance training" OR "aerobic exercise" OR “fitness” OR “exercise” OR "physical exercise" OR “physiotherapy” OR "respiratory therapy" OR "pulmonary rehabilitation") AND (“Covid” OR “sars” OR “coronavirus” OR “SARS-CoV-2”) AND (“randomized controlled trials” OR “rtc” OR “clinical trials”) | 64 |
| Web Of Science | **((((((((TI=("resistance training" )) OR TI=( "aerobic exercise" )) OR TI=(fitness )) OR TI=(exercise)) OR TI=("physical exercise" )) OR TI=(physiotherapy)) OR TI=("respiratory therapy" )) OR TI=( "pulmonary rehabilitation" )) AND (((TI=(“Covid” )) OR TI=( “sars” )) OR TI=(“coronavirus” )) OR TI=(“SARS-CoV-2” )** AND **TS=(hospital*) AND** **English** or **Spanish** or **Portuguese**(Languages) AND **Articles** (Document Types) | 73 |
| COCHRANE | ("physical activity" OR "aerobic capacity" OR "resistance training" OR "aerobic exercise" OR fitness OR "physical exercise" OR physiotherapy OR "respiratory therapy" OR "pulmonary rehabilitation"):ti AND ("Covid" OR "sars" OR "coronavirus" OR "SARS-CoV-2"):ti | 28 |
| PEDro | “physical activity” AND covid; physiotherapy AND covid; “physical exercise” AND covid; “aerobic exercise” AND covid; “resistance training” AND covid; fitness AND covid; “physical exercise” AND covid | 5 |
| Google scholar | (“physical activity” OR"aerobic exercise” OR"resistance training" OR“fitness” OR“physical exercise” OR“physiotherapy” OR “pulmonary rehabilitation”) +(“Covid” OR“sars” OR“coronavirus”) +("clinical trial" OR "intervention study") -"review" -"pediatric" | 15 |
| Scielo | ((((ab:((ab:((ab:((ab:((ab:((ab:(exercise)) OR (ab:(“physical activity” )) OR (ab:("resistance training" )) OR (ab:(“physical exercise” )) OR (ab:(“fitness” )) OR (ab:(“physiotherapy” )) OR (ab: (“pulmonary rehabilitation”)) OR (ab: (“respiratory therapy”)) AND (ab:(“Covid” )) OR (ab:(“sars” )) OR (ab:(“coronavirus”))))))))))))))) AND NOT (ti:(review))) AND NOT (ab:(pediatr$))) AND (ti:(hospital$)) | 12 |
